# Supplementary material for: Switching excitons between the emissive and photochromic pathways in the triphenylethylene system
Source: Royal Society of Chemistry journal article supplement (doi:10.1039/d1tc02393d), 2021-01-01
Supplement: d1tc02393d1.pdf [file d1tc02393d1.pdf]

## Supporting Information

### **Switching excitons between the emissive and photochromic pathways in triphenylethylene system**

*Xiayu Zhang<sup>a,b</sup>, Tao Yu<sup>a\*</sup>, Cheng Huang<sup>a</sup>, Hailan Wang<sup>a</sup>, Mengyang Dong<sup>a</sup>, Rongjuan Huang<sup>a\*</sup>, Zongliang Xie<sup>a</sup>, Shanshan Wei<sup>b</sup>, and Wei Huang<sup>a,c,d\*</sup>*

[a] Mr. X. Zhang, Prof. T. Yu, Mr. C. Huang, Ms. H. Wang, Mr. M. Dong, Dr. R. Huang, Dr. Z. Xie, Prof. W. Huang

Frontiers Science Center for Flexible Electronics (FSCFE), Shaanxi Institute of Flexible Electronics (SIFE), Northwestern Polytechnical University (NPU), 127 West Youyi Road, Xi'an 710072, China.

E-mail: iamtyu@nwpu.edu.cn; rongjuan.huang@nwpu.edu.cn; iamwhuang@nwpu.edu.cn

[b] Mr. X. Zhang, Prof. S. Wei

School of Packaging and Materials Engineering, Hunan University of Technology, Zhuzhou 412007, P. R. China

[c] Prof. W. Huang

Key Laboratory of Flexible Electronics (KLOFE) & Institute of Advanced Materials (IAM), Nanjing Tech University (NanjingTech), 30 South Puzhu Road, Nanjing 211816, China

[d] Prof. W. Huang

Laboratory for Organic Electronics and Information Displays & Jiangsu Key Laboratory for Biosensors, Institute of Advanced Materials (IAM), Jiangsu National Synergetic Innovation Center for Advanced Materials (SICAM), Nanjing University of Posts and Telecommunications, 9 Wenyuan Road, Nanjing 210023, China.

## CONTENT

|                                                                                                                                                                                                                             |           |
|-----------------------------------------------------------------------------------------------------------------------------------------------------------------------------------------------------------------------------|-----------|
| <b>Experimental Procedures</b> .....                                                                                                                                                                                        | <b>3</b>  |
| <b>General Methods</b> .....                                                                                                                                                                                                | <b>3</b>  |
| <b>Materials and Syntheses</b> .....                                                                                                                                                                                        | <b>3</b>  |
| Scheme S1. Synthetic routes for TrPEF <sub>2</sub> I, TrPEF <sub>2</sub> ≡TMS and TrPEF <sub>2</sub> ≡H.....                                                                                                                | 3         |
| <b>Supplementary Information</b> .....                                                                                                                                                                                      | <b>4</b>  |
| Scheme S2. Schematic diagram of photochromic mechanism of TrPEF <sub>2</sub> ≡H.....                                                                                                                                        | 5         |
| Scheme S3. Schematic diagram of photochromic mechanism of TrPEF <sub>2</sub> ≡TMS.....                                                                                                                                      | 5         |
| Figure S1. Emission spectra of TrPEF <sub>2</sub> ≡H and TrPEF <sub>2</sub> ≡TMS in solid states.....                                                                                                                       | 6         |
| Figure S2. Recycling of the photochromic process of TrPEF <sub>2</sub> ≡H and TrPEF <sub>2</sub> ≡TMS in solid state.....                                                                                                   | 6         |
| Figure S3. First-order kinetic plot for decoloring of TrPEF <sub>2</sub> ≡TMS and TrPEF <sub>2</sub> ≡H.....                                                                                                                | 6         |
| Figure S4. pXRD spectra of TrPEF <sub>2</sub> ≡H and TrPEF <sub>2</sub> ≡TMS in solid state.....                                                                                                                            | 7         |
| Figure S5. Photographs of TrPEF <sub>2</sub> ≡H and TrPEF <sub>2</sub> ≡TMS in crystalline state.....                                                                                                                       | 7         |
| Figure S6. The fluorescence decays of TrPEF <sub>2</sub> ≡H and TrPEF <sub>2</sub> ≡TMS in solid states.....                                                                                                                | 8         |
| Figure S7. Emission spectra of TrPEF <sub>2</sub> ≡H and TrPEF <sub>2</sub> ≡TMS doped PMMA films with the doping concentration of 5 wt%. Excitation at 365 nm.....                                                         | 8         |
| Figure S8. Time dependent UV-vis absorption spectra of compound TrPEF <sub>2</sub> ≡H and TrPEF <sub>2</sub> ≡TMS.....                                                                                                      | 8         |
| Figure S9. HOMOs and LUMOs of E-products of TrPEF <sub>2</sub> ≡TMS and TrPEF <sub>2</sub> ≡H.....                                                                                                                          | 9         |
| Table S1. Calculated HOMO, LUMO distributions, energy levels, energy gap and oscillator strength (f value) for TrPEF <sub>2</sub> ≡TMS, TrPEF <sub>2</sub> ≡TMS(c), TrPEF <sub>2</sub> ≡H and TrPEF <sub>2</sub> ≡H(c)..... | 9         |
| <b>Single Crystal Data</b> .....                                                                                                                                                                                            | <b>9</b>  |
| Table S2. Crystal data for TrPEF <sub>2</sub> ≡H.....                                                                                                                                                                       | 10        |
| Figure S10. Single crystal structure of TrPEF <sub>2</sub> ≡H.....                                                                                                                                                          | 10        |
| Table S3. Bond distances (Å) for TrPEF <sub>2</sub> ≡H.....                                                                                                                                                                 | 10        |
| Table S4. Bond angles (°) for TrPEF <sub>2</sub> ≡H.....                                                                                                                                                                    | 11        |
| Table S5. Crystal data for TrPEF <sub>2</sub> ≡TMS.....                                                                                                                                                                     | 13        |
| Table S6. Bond distances (Å) for TrPEF <sub>2</sub> ≡TMS.....                                                                                                                                                               | 13        |
| Table S7. Bond angles (°) for TrPEF <sub>2</sub> ≡TMS.....                                                                                                                                                                  | 14        |
| Figure S11. Single crystal structure of TrPEF <sub>2</sub> ≡TMS.....                                                                                                                                                        | 15        |
| <b>Characterization of Chemical Structure</b> .....                                                                                                                                                                         | <b>15</b> |
| Figure S12. <sup>1</sup> H NMR spectrum of TrPEF <sub>2</sub> I(in Chloroform- <i>d</i> ).....                                                                                                                              | 15        |
| Figure S13. <sup>1</sup> H NMR spectrum of TrPEF <sub>2</sub> ≡TMS (in Chloroform- <i>d</i> ).....                                                                                                                          | 16        |
| Figure S14. <sup>1</sup> H NMR spectrum of TrPEF <sub>2</sub> ≡H (in Chloroform- <i>d</i> ).....                                                                                                                            | 16        |
| Figure S15. <sup>13</sup> C NMR spectrum of TrPEF <sub>2</sub> ≡H (in Chloroform- <i>d</i> ).....                                                                                                                           | 17        |
| Figure S16. <sup>13</sup> C NMR spectrum of TrPEF <sub>2</sub> ≡TMS (in Chloroform- <i>d</i> ).....                                                                                                                         | 17        |
| Figure S17. High Resolution EI mass spectrum of compound TrPEF <sub>2</sub> ≡H.....                                                                                                                                         | 18        |
| Figure S18. High Resolution EI mass spectrum of compound TrPEF <sub>2</sub> ≡TMS.....                                                                                                                                       | 18        |
| <b>Reference</b> .....                                                                                                                                                                                                      | <b>18</b> |

## Experimental Procedures

### General Methods

$^1\text{H}$  NMR,  $^{13}\text{C}$  NMR spectra for the materials were performed on a Bruker Avance NEO 500 Nuclear Magnetic Resonance Spectrometer with Chloroform-*d* as solvent and tetramethylsilane (TMS) as the internal standard. High resolution Mass spectra (MS) were recorded on an Exactive GC high resolution mass spectrometer. PXRD data were obtained on a Bruker X-ray diffractometer (D8 Advance) by using an Cu  $K\alpha$  ( $\lambda = 0.154184$  nm) X-ray source in the circumstances of 40 kV and 30 mA, with a speed of  $10^\circ$  (2 $\theta$ ) per 1 min. Single-crystal X-ray analyses were collected using an Bruker D8 Venture X-ray Single Crystal Diffractometer with a (Cu) X-ray source. UV-vis absorption spectra and photoluminescence (PL) spectra were obtained on an Ocean Optic QE 65Pro spectrometer with Ocean Optic reflection probes R600-125F, respectively. TD-DFT calculations at B3LYP functional with 6-311G\* basis set level were performed based on single crystal structure in Gaussian 09 software on the grounds of previous literatures<sup>[1, 2]</sup>.

### Materials and syntheses

The compounds  $\text{TrPEF}_2\equiv\text{TMS}$  and  $\text{TrPEF}_2\equiv\text{H}$  were synthesized according to the synthetic routes described in Scheme S1. The details of the synthetic procedure for  $\text{TrPEF}_2\text{I}$  was according to previous literature<sup>[3]</sup> All the final compounds were characterized by  $^1\text{H}$  NMR spectroscopy, high-resolution EI mass spectroscopy. All reagents and solvents were purchased from Aladdin, Titan or Adamas, and were used as received.

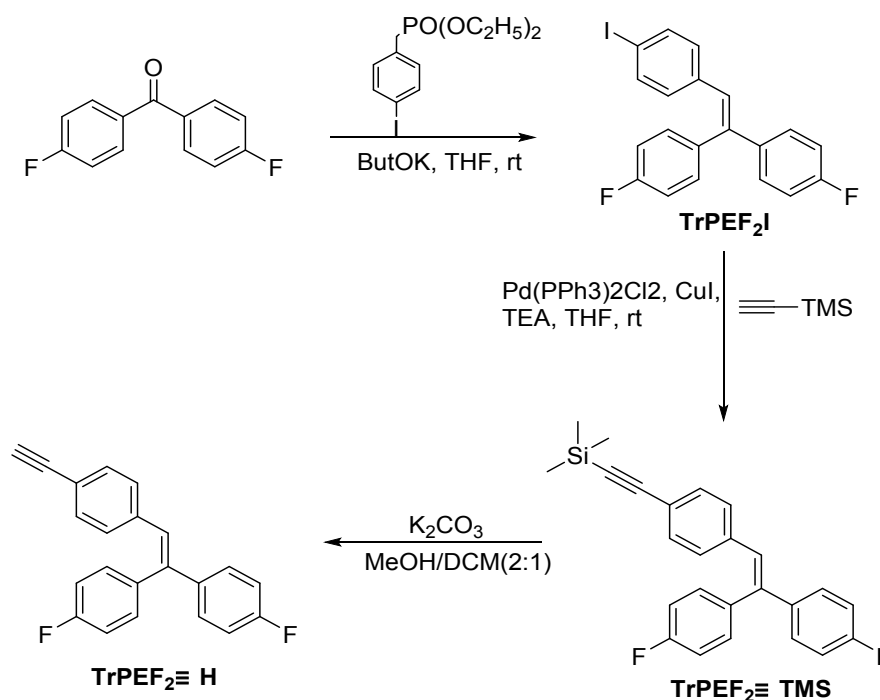

**Scheme S1** Synthetic routes for  $\text{TrPEF}_2\text{I}$ ,  $\text{TrPEF}_2\equiv\text{TMS}$  and  $\text{TrPEF}_2\equiv\text{H}$

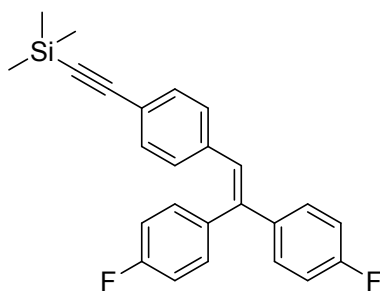

**TrPEF<sub>2</sub>≡TMS:** To a mixture of TrPEF<sub>2</sub>I (2.50 g, 5.98 mmol), CuI (56.92 mg) and Pd(PPh<sub>3</sub>)<sub>2</sub>Cl<sub>2</sub> (350 mg, 0.5 mmol) in degassed THF (40 ml) and Et<sub>3</sub>N (10 ml) under an argon atmosphere was added trimethylsilylacetylene (8.97 mmol) in a dropwise manner. The resulting mixture was stirred at ambient temperature for 20 hours. The mixture was then filtered, and the filtrate was poured into water and extracted with CH<sub>2</sub>Cl<sub>2</sub>. Further purification was done by column chromatography on silica gel with hexane as eluent. Solvent removal yielded a light white solid. Yield: 1.82 g (78 %). <sup>1</sup>H NMR (500 MHz, CD<sub>3</sub>Cl, 298 K, relative to Me<sub>4</sub>Si): δ = 0.23 (s, 9H), 6.85 (s, 1H), 6.93 (d, 7.8 Hz, 2H), 6.69-7.03 (m, 4H), 7.11-7.14 (m, 2H), 7.24-7.28 (m, 4H); High solution EI-MS: m/z found: 388.1449 [M]<sup>+</sup>; calcd for C<sub>25</sub>H<sub>22</sub>F<sub>2</sub>Si: 388.1459.

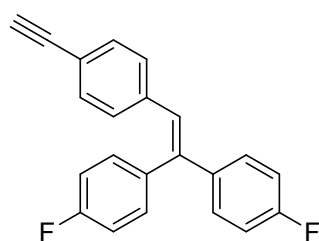

**TrPEF<sub>2</sub>≡H:** To a solution of TrPEF<sub>2</sub>≡TMS (1.00 g, 2.57 mmol) in methanol/CH<sub>2</sub>Cl<sub>2</sub> (30 ml, v/v = 2:1) was added K<sub>2</sub>CO<sub>3</sub> (1.07 g, 7.72 mmol) and stirred at room temperature for 12 h. The resulting mixture was added to water and extracted with ethyl ether. The solvent was removed and the residue was further purified by silica gel column chromatography. Solvent removal yielded a light white solid. Yield: 0.65 g (80 %). <sup>1</sup>H NMR (500 MHz, CD<sub>3</sub>Cl, 298 K, relative to Me<sub>4</sub>Si): δ = 3.07 (s, 1H), 6.86 (s, 1H), 6.95 (d, 8.0 Hz, 2H), 6.99-7.04 (m, 6H), 7.12-7.15 (m, 2H), 7.24-7.28 (m, 2H); High solution EI-MS: m/z found: 316.1054 [M]<sup>+</sup>; calcd for C<sub>22</sub>H<sub>14</sub>F<sub>2</sub>: 316.1064.

## Supplementary Information

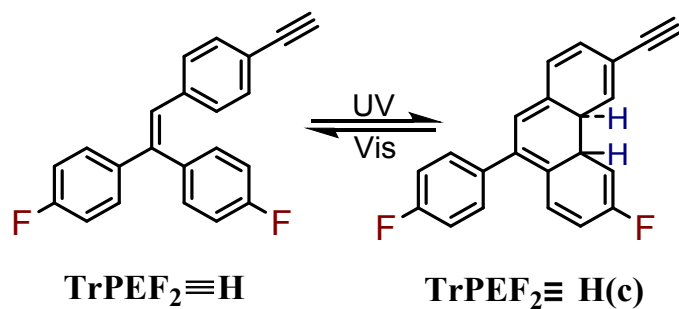

**Scheme S2** Schematic diagram of photochromic mechanism of TrPEF<sub>2</sub>≡H

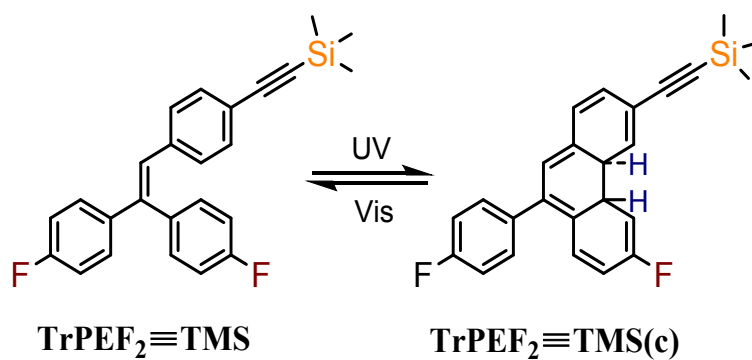

**Scheme S3** Schematic diagram of photochromic mechanism of TrPEF<sub>2</sub>≡TMS

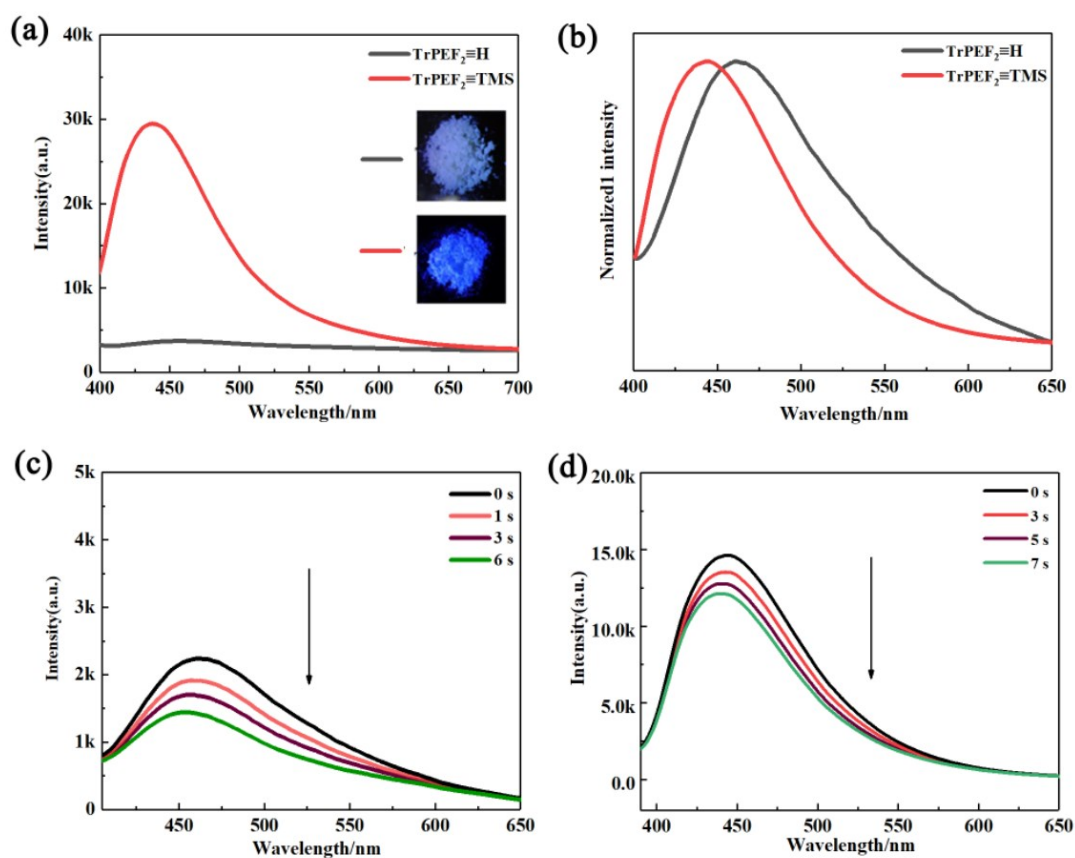

**Figure S1** (a) Emission spectra of  $\text{TrPEF}_2\equiv\text{H}$  and  $\text{TrPEF}_2\equiv\text{TMS}$  in powder states, the inset shows the photographs of the  $\text{TrPEF}_2\equiv\text{H}$  and  $\text{TrPEF}_2\equiv\text{TMS}$  upon 365 nm UV irradiation. (b) Normalized emission spectra of  $\text{TrPEF}_2\equiv\text{H}$  and  $\text{TrPEF}_2\equiv\text{TMS}$  in powder states. Emission spectra of (c)  $\text{TrPEF}_2\equiv\text{H}$  and (d)  $\text{TrPEF}_2\equiv\text{TMS}$  respond to UV irradiation time.

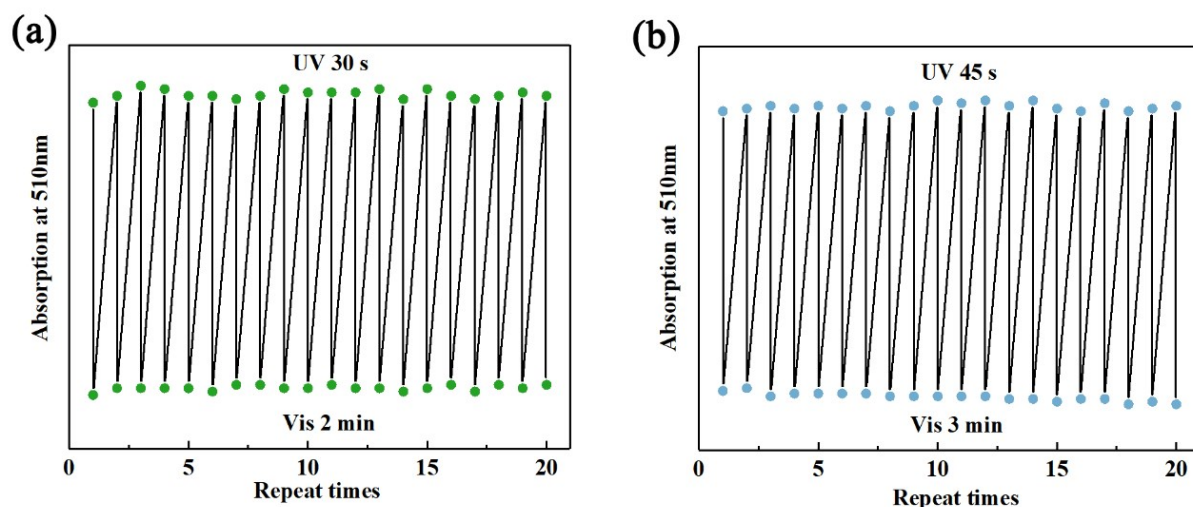

**Figure S2** (a) Recycling of the photochromic and recovery processes of compound  $\text{TrPEF}_2\equiv\text{TMS}$  in powder state as a function of exposure time, irradiating under the UV-light (365 nm) and white-light for 30 seconds and 2 minutes, respectively. (b) Recycling of the photochromic and recovery process of compound  $\text{TrPEF}_2\equiv\text{H}$  in powder state as a function of exposure time, irradiating under the UV-light (365 nm) and white-light for 45 seconds and 3 minutes, respectively.

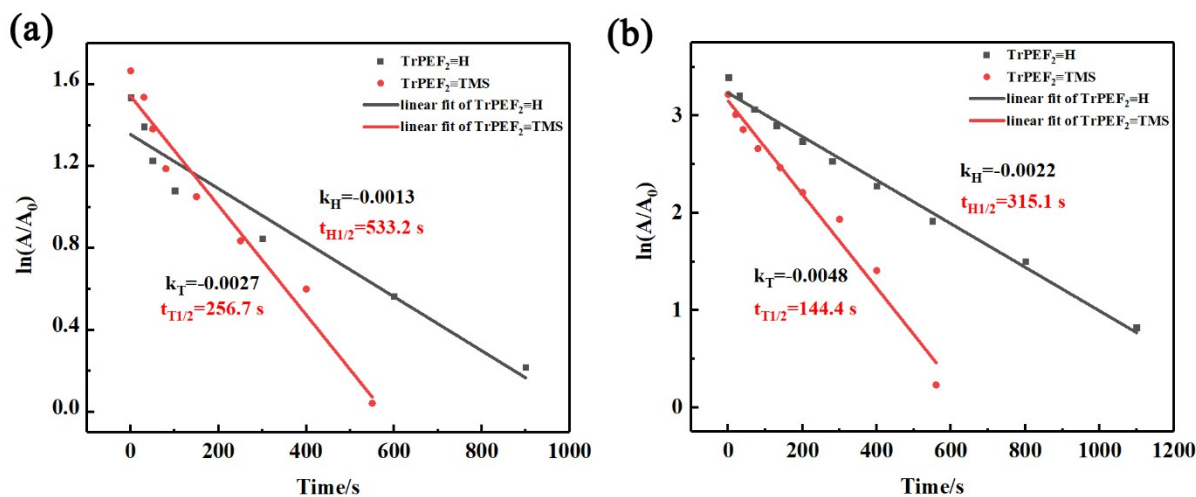

**Figure S3** First-order kinetic plots for decoloring of  $\text{TrPEF}_2\equiv\text{TMS}$  and  $\text{TrPEF}_2\equiv\text{H}$  (a) in solutions and (b) in films at the wavelength of 460 nm. ( $A=A_0 \exp(-kt)$ ,  $A_0$  is the absorbance before irradiation ( $t = 0$ ), and  $A$  is the absorbance at the moment of irradiation time)

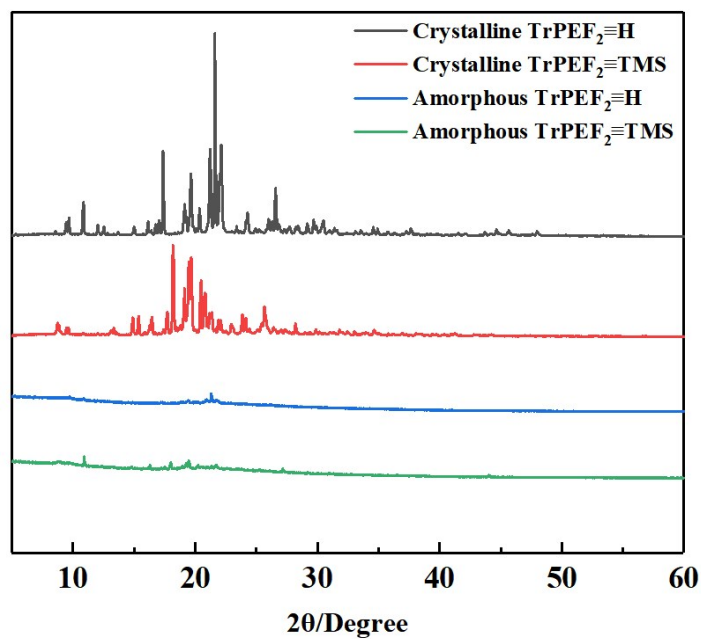

**Figure S4** pXRD spectra of  $\text{TrPEF}_2=\text{H}$  and  $\text{TrPEF}_2=\text{TMS}$  in solid state.

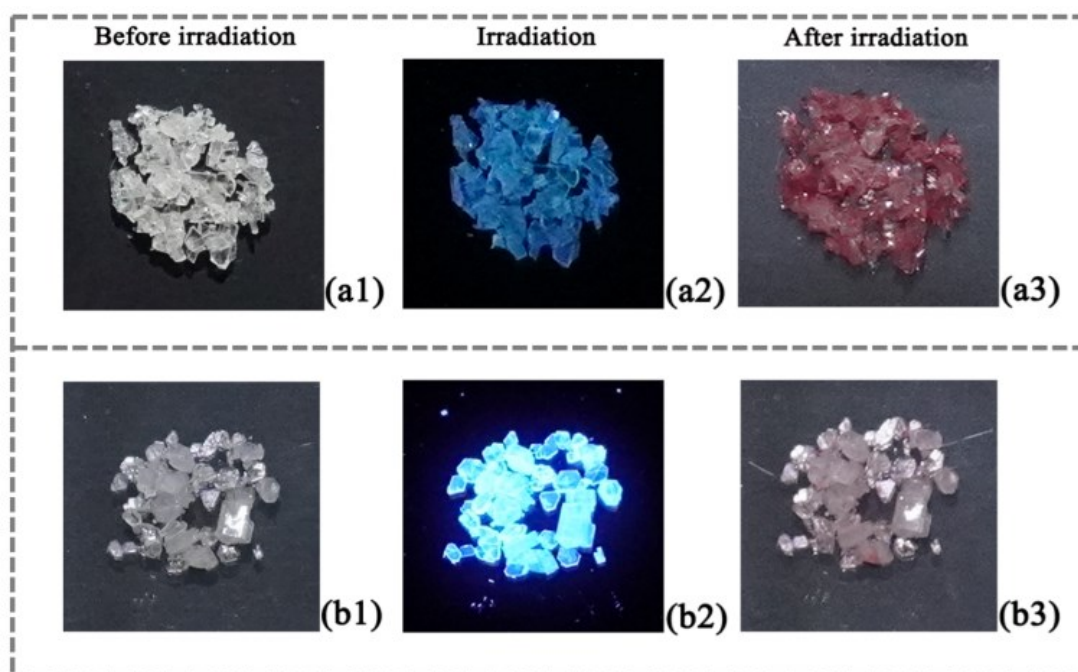

**Figure S5** Photographs of  $\text{TrPEF}_2=\text{H}$  (a1) before irradiation, (b1) under irradiation and (c1) after irradiation; and of  $\text{TrPEF}_2=\text{TMS}$  (a2) before irradiation, (b2) under irradiation and (c2) after irradiation. Excitation source was 365 nm under ambient conditions.

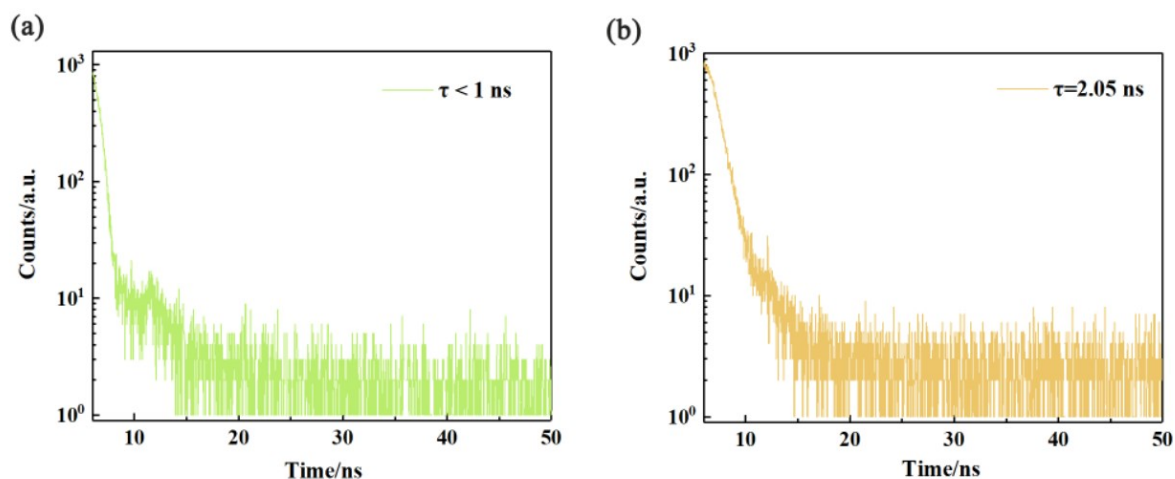

**Figure S6** The fluorescence decays of (a) TrPEF<sub>2</sub>≡H and (b) TrPEF<sub>2</sub>≡TMS in solid states under 365 nm excitation at room temperature.

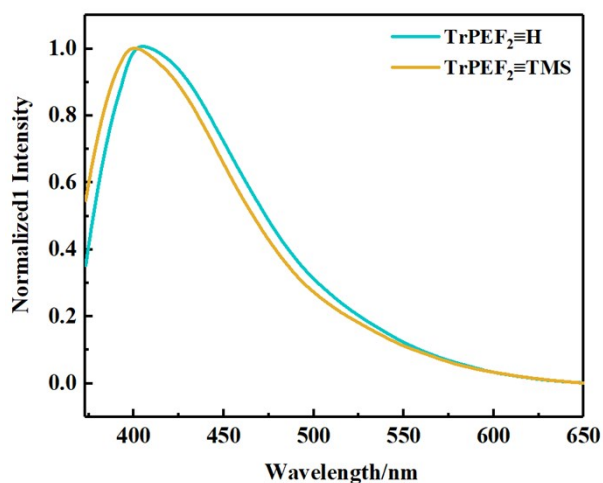

**Figure S7** Emission spectra of TrPEF<sub>2</sub>≡H and TrPEF<sub>2</sub>≡TMS doped PMMA films with the doping concentration of 5 wt%. Excitation at 365 nm.

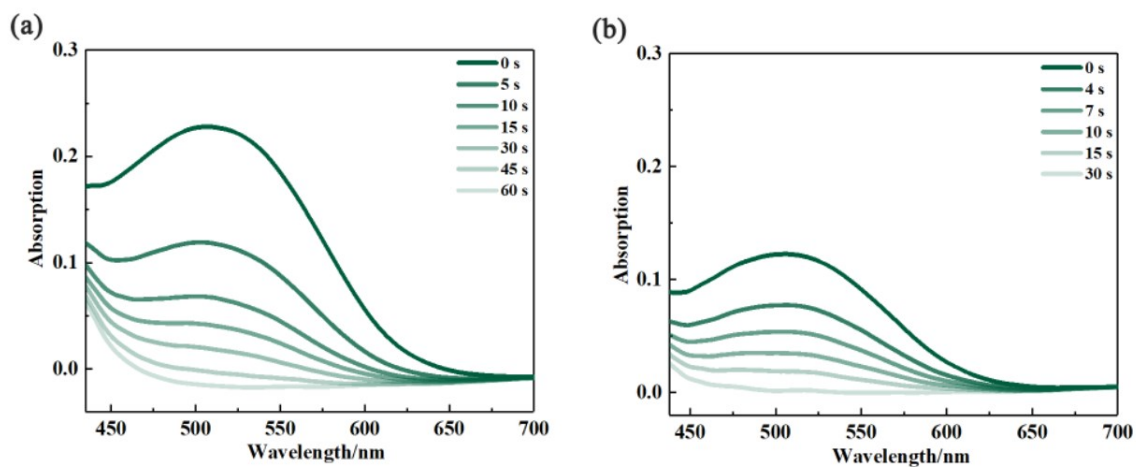

**Figure S8** Time dependent UV-vis absorption spectra of compound (a) TrPEF<sub>2</sub>≡H and (b) TrPEF<sub>2</sub>≡TMS powders during the photochromic bleaching process.



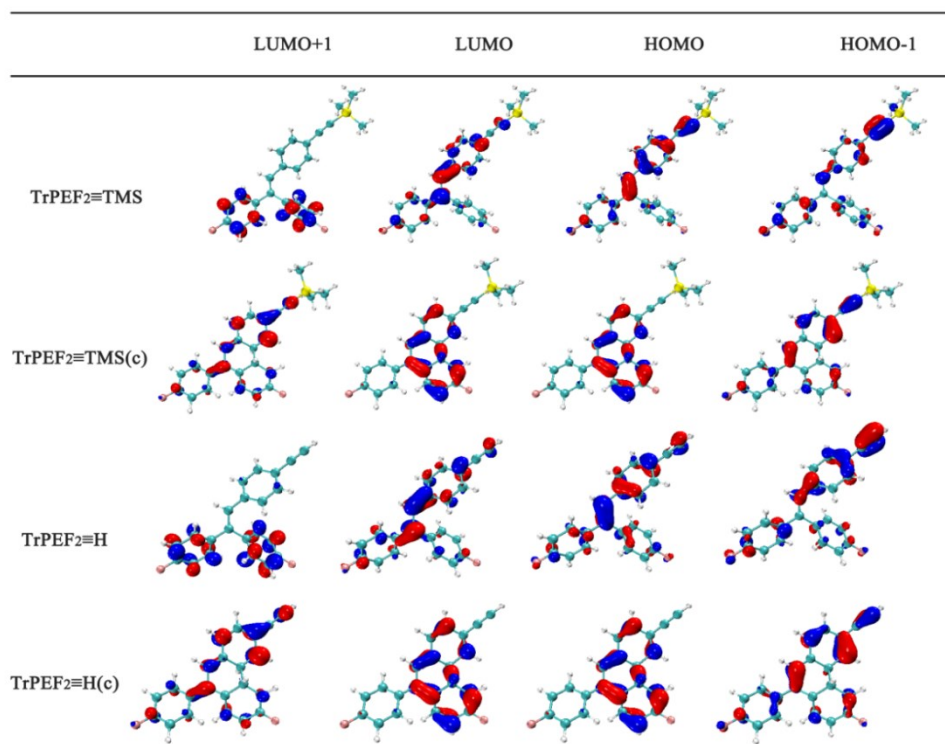

**Figure S9** HOMOs and LUMOs of E-products of TrPEF<sub>2</sub>≡TMS, TrPEF<sub>2</sub>≡TMS(c), TrPEF<sub>2</sub>≡H and TrPEF<sub>2</sub>≡H(c) calculated with B3LYP/6-311+G(d,p) level.

**Table S1** Calculated HOMO, LUMO distributions, energy levels, energy gap and oscillator strength (f value) for TrPEF<sub>2</sub>≡TMS, TrPEF<sub>2</sub>≡TMS(c), TrPEF<sub>2</sub>≡H and TrPEF<sub>2</sub>≡H(c).

| Sample                     | E <sub>LUMO+1</sub> (eV) | E <sub>LUMO</sub> (eV) | E <sub>HOMO</sub> (eV) | E <sub>HOMO-1</sub> (eV) | E <sub>g</sub> (eV) | oscillator strength (f value) |
|----------------------------|--------------------------|------------------------|------------------------|--------------------------|---------------------|-------------------------------|
| TrPEF <sub>2</sub> ≡TMS    | -1.05                    | -1.84                  | -5.89                  | -6.94                    | 4.05                | 1.0032                        |
| TrPEF <sub>2</sub> ≡TMS(c) | -1.22                    | -2.55                  | -4.43                  | -5.80                    | 1.88                | 0.0714                        |
| TrPEF <sub>2</sub> ≡H      | -1.08                    | -1.90                  | -6.01                  | -7.13                    | 4.11                | 0.6594                        |
| TrPEF <sub>2</sub> ≡H(c)   | -1.22                    | -2.58                  | -4.47                  | -5.88                    | 1.89                | 0.0696                        |

### Single crystal data of TrPEF<sub>2</sub>≡TMS and TrPEF<sub>2</sub>≡H

Single-crystal X-ray analyses for TrPEF<sub>2</sub>≡TMS and TrPEF<sub>2</sub>≡H were performed on an Oxford Diffraction Gemini S Ultra X-ray single-crystal diffractometer with graphite-monochromatized Cu-K $\alpha$

radiation ( $\lambda = 1.54184 \text{ \AA}$ ). The structure was solved with Olex2 v1.2 program and expanded using Fourier techniques. Non-H atoms of this compound was further refined with anisotropic thermal parameters. The hydrogen atoms were added in idealized positions and refined with fixed geometry according to their carrier atoms.

**Table S2.** Crystal data for  $\text{TrPEF}_2\equiv\text{H}$ ;

|                                  |                                        |                                              |                             |
|----------------------------------|----------------------------------------|----------------------------------------------|-----------------------------|
| <b>Formula</b>                   | $\text{C}_{22}\text{H}_{14}\text{F}_2$ | $\gamma/^\circ$                              | $95.6220(10)^\circ$         |
| <b>Formula weight</b>            | 316.33                                 | <b>Volume/<math>\text{\AA}^3</math></b>      | 1646.92(9)                  |
| <b>Temperature/K</b>             | 150.0                                  | $\rho_{\text{calc}}/\text{g cm}^{-3}$        | 1.2758                      |
| <b>Crystal system</b>            | triclinic                              | $\mu/\text{mm}^{-1}$                         | 0.724                       |
| <b>Space group</b>               | $P-1$                                  | <b>F(000)</b>                                | 658.2                       |
| <b>a/<math>\text{\AA}</math></b> | 9.6755(3)                              | <b>Crystal size/<math>\text{mm}^3</math></b> | $0.5 \times 0.2 \times 0.1$ |
| <b>b/<math>\text{\AA}</math></b> | 10.4719(3)                             | <b>Reflections collected</b>                 | 30043                       |
| <b>c/<math>\text{\AA}</math></b> | 17.0175(5)                             | $D_x/\text{g cm}^{-3}$                       | 1.276                       |
| $\alpha/^\circ$                  | $97.5810(10)^\circ$                    | <b>Unique (<math>R_{\text{int}}</math>)</b>  | 0.1374                      |
| $\beta/^\circ$                   | $90103.5160(10)^\circ$                 |                                              |                             |

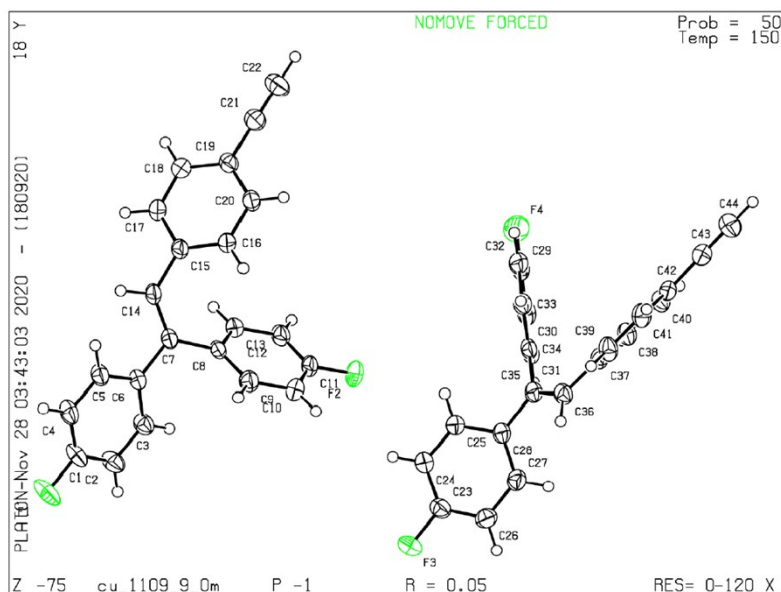

**Figure S10** Single crystal structure of  $\text{TrPEF}_2\equiv\text{H}$ .

**Table S3** Bond distances ( $\text{\AA}$ ) for  $\text{TrPEF}_2\equiv\text{H}$

| Atom | Atom | Length/ $\text{\AA}$ | Atom | Atom | Length/ $\text{\AA}$ |
|------|------|----------------------|------|------|----------------------|
|------|------|----------------------|------|------|----------------------|

|     |     |            |     |     |            |
|-----|-----|------------|-----|-----|------------|
| F3  | C23 | 1.3591(16) | C35 | C36 | 1.347(2)   |
| F2  | C11 | 1.3601(14) | C3  | C2  | 1.383(2)   |
| F1  | C1  | 1.3625(16) | C12 | C11 | 1.373(2)   |
| F4  | C29 | 1.3569(17) | C14 | C15 | 1.4709(19) |
| C8  | C13 | 1.3955(18) | C9  | C10 | 1.3914(19) |
| C8  | C7  | 1.4947(16) | C15 | C17 | 1.397(2)   |
| C8  | C9  | 1.3915(19) | C42 | C41 | 1.3980(19) |
| C13 | C12 | 1.3898(18) | C42 | C43 | 1.4348(19) |
| C34 | C35 | 1.4904(19) | C5  | C4  | 1.381(2)   |
| C34 | C33 | 1.3974(19) | C33 | C32 | 1.384(2)   |
| C34 | C31 | 1.3977(19) | C18 | C17 | 1.378(2)   |
| C28 | C35 | 1.4846(18) | C18 | C19 | 1.399(2)   |
| C28 | C27 | 1.3977(19) | C26 | C27 | 1.386(2)   |
| C28 | C25 | 1.4011(19) | C26 | C23 | 1.376(2)   |
| C6  | C7  | 1.4865(18) | C30 | C31 | 1.388(2)   |
| C6  | C3  | 1.4016(18) | C30 | C29 | 1.375(2)   |
| C6  | C5  | 1.4008(18) | C39 | C41 | 1.382(2)   |
| C40 | C38 | 1.3781(19) | C24 | C23 | 1.379(2)   |
| C40 | C42 | 1.3983(19) | C24 | C25 | 1.3842(19) |
| C7  | C14 | 1.3482(19) | C4  | C1  | 1.377(2)   |
| C38 | C37 | 1.4021(18) | C11 | C10 | 1.375(2)   |
| C20 | C16 | 1.378(2)   | C21 | C19 | 1.435(2)   |
| C20 | C19 | 1.398(2)   | C21 | C22 | 1.184(2)   |
| C16 | C15 | 1.4070(18) | C32 | C29 | 1.378(2)   |
| C37 | C36 | 1.4707(18) | C2  | C1  | 1.376(2)   |
| C37 | C39 | 1.3994(19) | C43 | C44 | 1.183(2)   |

**Table S4** Bond Angles (°) for TrPEF<sub>2</sub>≡H

| Atom | Atom | Atom | Angle/°    | Atom | Atom | Atom | Angle/°    |
|------|------|------|------------|------|------|------|------------|
| C7   | C8   | C13  | 119.46(12) | C43  | C42  | C40  | 120.04(13) |
| C9   | C8   | C13  | 118.61(12) | C43  | C42  | C41  | 121.23(13) |

---

|     |     |     |            |     |     |     |            |
|-----|-----|-----|------------|-----|-----|-----|------------|
| C9  | C8  | C7  | 121.92(12) | C4  | C5  | C6  | 121.83(13) |
| C12 | C13 | C8  | 121.47(13) | C32 | C33 | C34 | 121.50(13) |
| C33 | C34 | C35 | 120.73(12) | C19 | C18 | C17 | 120.05(13) |
| C31 | C34 | C35 | 120.98(12) | C23 | C26 | C27 | 118.37(13) |
| C31 | C34 | C33 | 118.29(13) | C29 | C30 | C31 | 118.52(14) |
| C27 | C28 | C35 | 121.57(12) | C30 | C31 | C34 | 120.90(14) |
| C25 | C28 | C35 | 120.36(12) | C41 | C39 | C37 | 121.33(13) |
| C25 | C28 | C27 | 118.05(13) | C26 | C27 | C28 | 121.34(13) |
| C3  | C6  | C7  | 121.25(11) | C25 | C24 | C23 | 118.40(13) |
| C5  | C6  | C7  | 121.18(11) | C1  | C4  | C5  | 118.15(13) |
| C5  | C6  | C3  | 117.54(12) | C18 | C17 | C15 | 122.01(13) |
| C42 | C40 | C38 | 120.46(13) | C26 | C23 | F3  | 118.87(12) |
| C6  | C7  | C8  | 117.79(11) | C24 | C23 | F3  | 118.59(12) |
| C14 | C7  | C8  | 121.83(12) | C24 | C23 | C26 | 122.54(13) |
| C14 | C7  | C6  | 120.30(11) | C12 | C11 | F2  | 118.15(14) |
| C37 | C38 | C40 | 121.35(12) | C10 | C11 | F2  | 118.75(13) |
| C19 | C20 | C16 | 121.10(12) | C10 | C11 | C12 | 123.09(12) |
| C15 | C16 | C20 | 120.76(13) | C24 | C25 | C28 | 121.27(13) |
| C36 | C37 | C38 | 122.08(12) | C22 | C21 | C19 | 177.75(15) |
| C39 | C37 | C38 | 117.65(13) | C18 | C19 | C20 | 118.52(13) |
| C39 | C37 | C36 | 120.25(12) | C21 | C19 | C20 | 120.68(13) |
| C28 | C35 | C34 | 117.03(11) | C21 | C19 | C18 | 120.79(13) |
| C36 | C35 | C34 | 122.56(13) | C29 | C32 | C33 | 118.04(14) |
| C36 | C35 | C28 | 120.32(12) | C1  | C2  | C3  | 118.52(13) |
| C2  | C3  | C6  | 121.36(13) | C39 | C41 | C42 | 120.39(13) |
| C11 | C12 | C13 | 117.68(13) | C44 | C43 | C42 | 179.85(17) |
| C35 | C36 | C37 | 127.38(13) | C11 | C10 | C9  | 118.41(13) |
| C15 | C14 | C7  | 128.28(12) | C30 | C29 | F4  | 119.05(14) |
| C10 | C9  | C8  | 120.69(13) | C32 | C29 | F4  | 118.21(14) |
| C14 | C15 | C16 | 122.92(12) | C32 | C29 | C30 | 122.74(14) |

---

|     |     |     |            |    |    |    |            |
|-----|-----|-----|------------|----|----|----|------------|
| C17 | C15 | C16 | 117.47(13) | C4 | C1 | F1 | 118.91(13) |
| C17 | C15 | C14 | 119.60(12) | C2 | C1 | F1 | 118.51(13) |
| C41 | C42 | C40 | 118.73(13) | C2 | C1 | C4 | 122.58(14) |

**Table S5** Crystal data for TrPEF<sub>2</sub>≡TMS;

|                       |                                                   |                                        |                 |
|-----------------------|---------------------------------------------------|----------------------------------------|-----------------|
| <b>Formula</b>        | C <sub>25</sub> H <sub>22</sub> F <sub>2</sub> Si | $\gamma/^\circ$                        | 90°             |
| <b>Formula weight</b> | 388.52                                            | <b>Volume/Å<sup>3</sup></b>            | 2118.49(14)     |
| <b>Temperature/K</b>  | 150.0                                             | $\rho_{\text{calc}}/\text{g cm}^{-3}$  | 1.218           |
| <b>Crystal system</b> | monoclinic                                        | $\mu/\text{mm}^{-1}$                   | 1.176           |
| <b>Space group</b>    | <i>P</i> 21                                       | <b>F(000)</b>                          | 816.0           |
| <b>a/Å</b>            | 9.2475(4)                                         | <b>Crystal size/mm<sup>3</sup></b>     | 0.5 × 0.2 × 0.1 |
| <b>b/Å</b>            | 11.3110(4)                                        | <b>Reflections collected</b>           | 26712           |
| <b>c/Å</b>            | 20.2758                                           | <b>D<sub>x</sub>/g cm<sup>-3</sup></b> | 1.218           |
| $\alpha/^\circ$       | 90°                                               | <b>Unique (<i>R</i><sub>int</sub>)</b> | 0.1479          |
| $\beta/^\circ$        | 92.685(2)°                                        |                                        |                 |

**Table S6** Bond distances (Å) for TrPEF<sub>2</sub>≡TMS

| <b>Atom</b> | <b>Atom</b> | <b>Length/Å</b> | <b>Atom</b> | <b>Atom</b> | <b>Length/Å</b> |
|-------------|-------------|-----------------|-------------|-------------|-----------------|
| Si1         | C21         | 1.8481(16)      | C17         | C19         | 1.396(2)        |
| Si1         | C22         | 1.8549(17)      | C6          | C7          | 1.4903(19)      |
| Si1         | C23         | 1.8572(17)      | C6          | C4          | 1.402(2)        |
| Si1         | C24         | 1.8575(17)      | C6          | C5          | 1.396(2)        |
| F2          | C1          | 1.3612(17)      | C7          | C8          | 1.4905(19)      |
| F1          | C00Q        | 1.3638(18)      | C8          | C10         | 1.393(2)        |
| C13         | C14         | 1.474(2)        | C1          | C3          | 1.378(2)        |
| C13         | C7          | 1.347(2)        | C1          | C2          | 1.374(2)        |
| C14         | C15         | 1.4004(19)      | C4          | C2          | 1.387(2)        |
| C14         | C16         | 1.399(2)        | C12         | C00Q        | 1.372(2)        |
| C15         | C17         | 1.384(2)        | C19         | C20         | 1.436(2)        |
| C9          | C8          | 1.393(2)        | C20         | C21         | 1.206(2)        |
| C9          | C12         | 1.389(2)        | C5          | C3          | 1.393(2)        |
| C18         | C16         | 1.377(2)        | C10         | C11         | 1.384(2)        |

|     |     |          |     |      |          |
|-----|-----|----------|-----|------|----------|
| C18 | C19 | 1.401(2) | C11 | C00Q | 1.370(3) |
|-----|-----|----------|-----|------|----------|

**Table S7** Bond Angles (°) for TrPEF<sub>2</sub>≡TMS

| Atom | Atom | Atom | Angle/°    | Atom | Atom | Atom | Angle/°    |
|------|------|------|------------|------|------|------|------------|
| C21  | Si1  | C22  | 109.30(8)  | C9   | C8   | C7   | 120.90(12) |
| C21  | Si1  | C23  | 107.32(7)  | C9   | C8   | C10  | 118.78(14) |
| C21  | Si1  | C24  | 106.27(8)  | C10  | C8   | C7   | 120.17(13) |
| C22  | Si1  | C23  | 110.67(9)  | F2   | C1   | C3   | 118.91(14) |
| C22  | Si1  | C24  | 111.62(8)  | F2   | C1   | C2   | 118.41(14) |
| C23  | Si1  | C24  | 111.44(9)  | C2   | C1   | C3   | 122.68(14) |
| C7   | C13  | C14  | 129.35(13) | C2   | C4   | C6   | 121.13(14) |
| C15  | C14  | C13  | 118.69(12) | C00Q | C12  | C9   | 118.10(15) |
| C16  | C14  | C13  | 123.88(13) | C18  | C19  | C20  | 119.23(13) |
| C16  | C14  | C15  | 117.39(13) | C17  | C19  | C18  | 118.30(13) |
| C17  | C15  | C14  | 121.77(13) | C17  | C19  | C20  | 122.46(13) |
| C12  | C9   | C8   | 120.83(14) | C21  | C20  | C19  | 176.25(15) |
| C16  | C18  | C19  | 121.03(13) | C20  | C21  | Si1  | 172.85(13) |
| C15  | C17  | C19  | 120.24(13) | C3   | C5   | C6   | 121.20(14) |
| C4   | C6   | C7   | 119.40(13) | C1   | C3   | C5   | 118.21(14) |
| C5   | C6   | C7   | 122.37(13) | C1   | C2   | C4   | 118.48(14) |
| C5   | C6   | C4   | 118.21(14) | C11  | C10  | C8   | 120.89(15) |
| C18  | C16  | C14  | 121.20(13) | C00Q | C11  | C10  | 118.35(15) |
| C13  | C7   | C6   | 120.56(13) | F1   | C00Q | C12  | 118.34(16) |
| C13  | C7   | C8   | 124.32(13) | F1   | C00Q | C11  | 118.62(15) |
| C6   | C7   | C8   | 114.93(11) | C11  | C00Q | C12  | 123.04(15) |

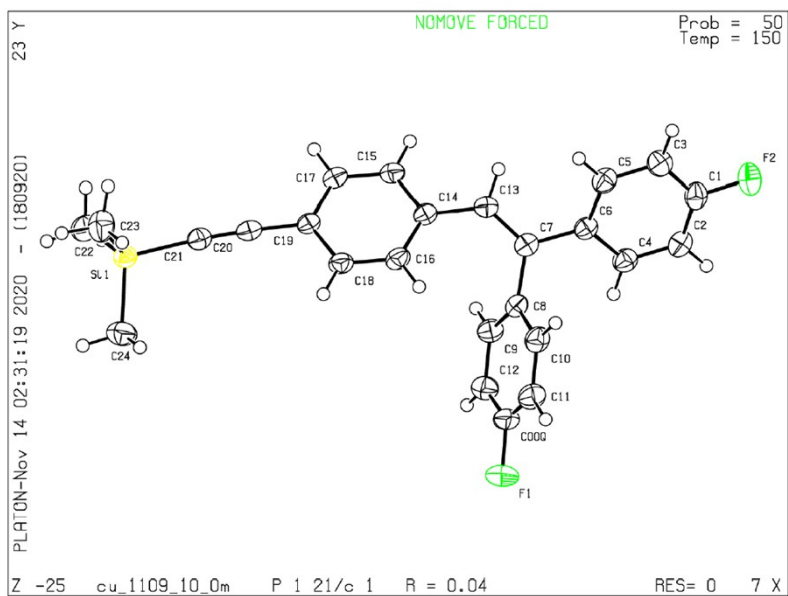

**Figure S11** Single crystal structure of TrPEF<sub>2</sub>≡TMS.

### Characterization of chemical structure

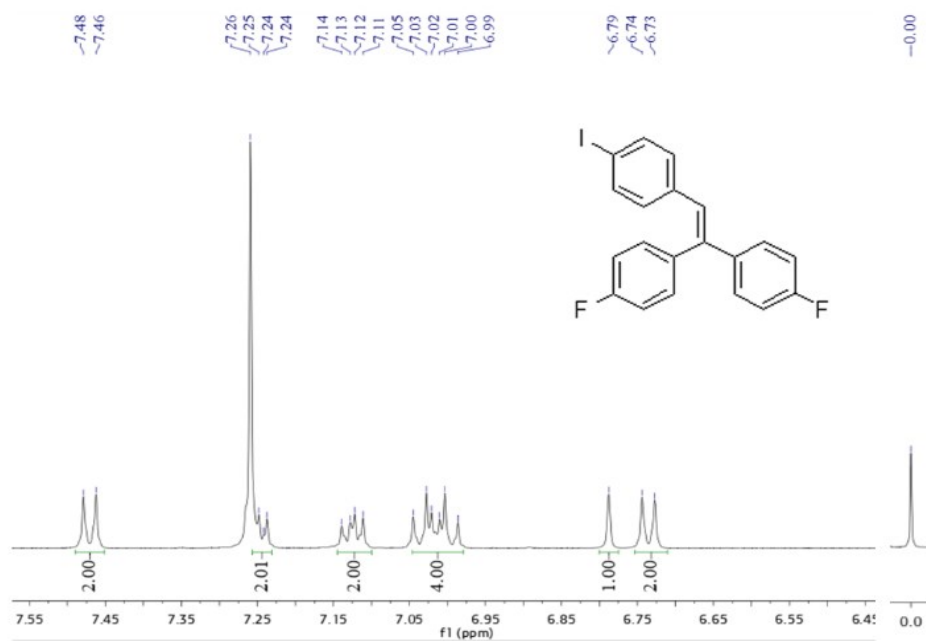

**Figure S12** <sup>1</sup>H NMR spectrum of TrPEF<sub>2</sub>I (in Chloroform-*d*).

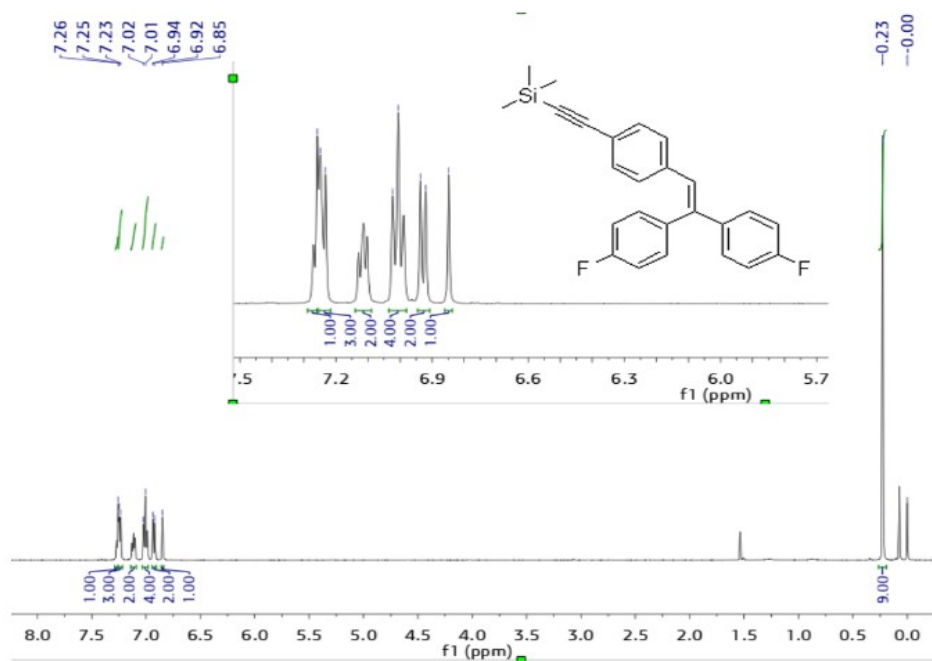

**Figure S13**  $^1\text{H}$  NMR spectrum of  $\text{TrPEF}_2\equiv\text{TMS}$  (in Chloroform-*d*).

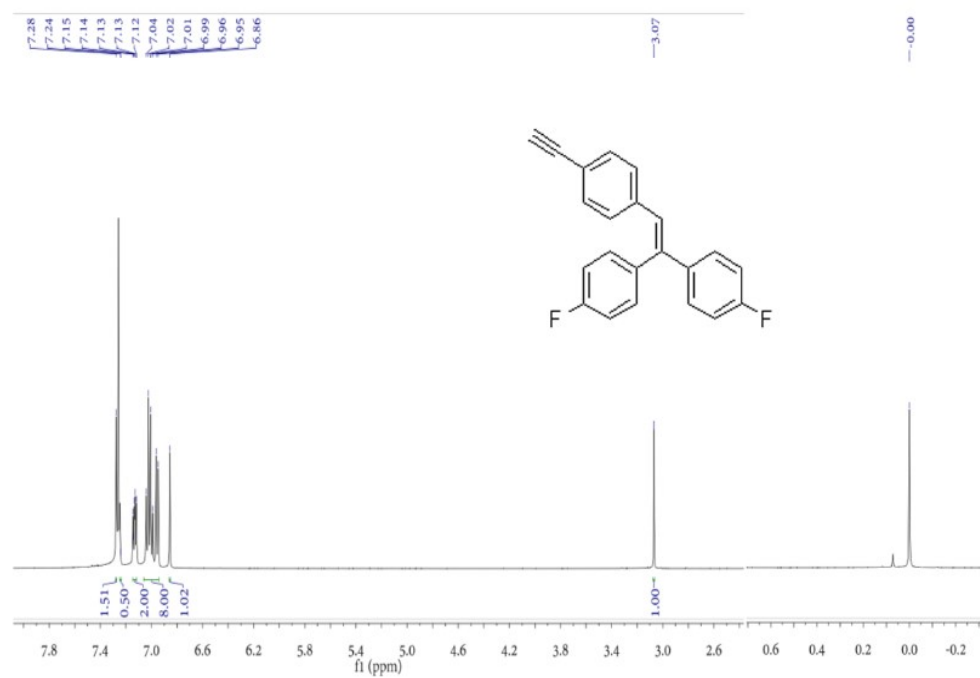

**Figure S14**  $^1\text{H}$  NMR spectrum of  $\text{TrPEF}_2\equiv\text{H}$  (in Chloroform-*d*).



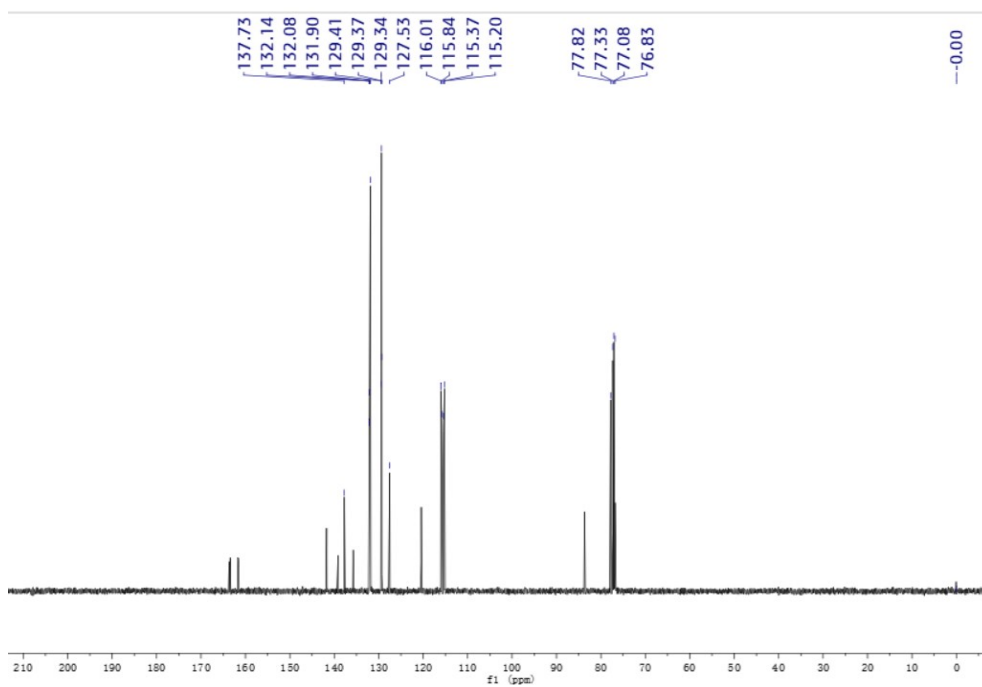

**Figure S15**  $^{13}\text{C}$  NMR spectrum of  $\text{TrPEF}_2\equiv\text{H}$  (in Chloroform-*d*).

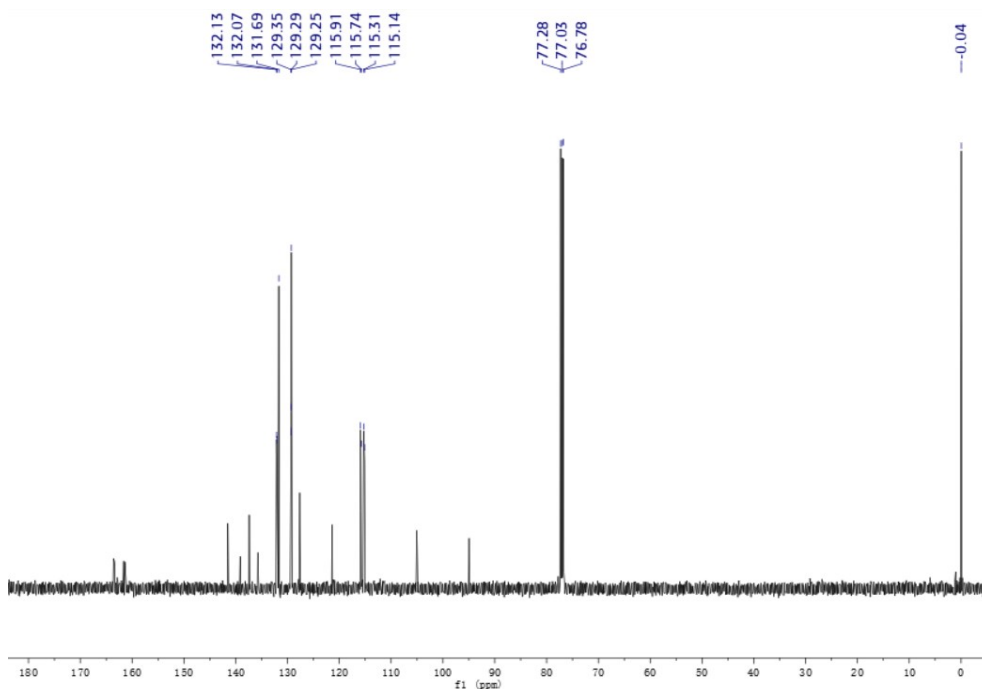

**Figure S16**  $^{13}\text{C}$  NMR spectrum of  $\text{TrPEF}_2\equiv\text{TMS}$  (in Chloroform-*d*).

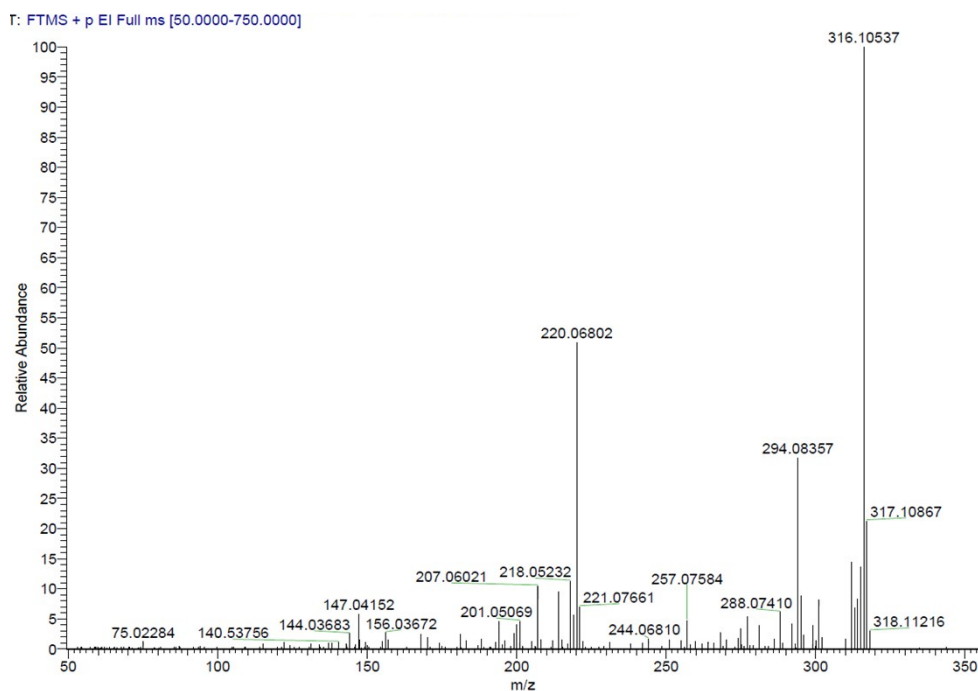

**Figure S17** High resolution EI mass spectrum of compound  $\text{TrPEF}_2\equiv\text{H}$ .

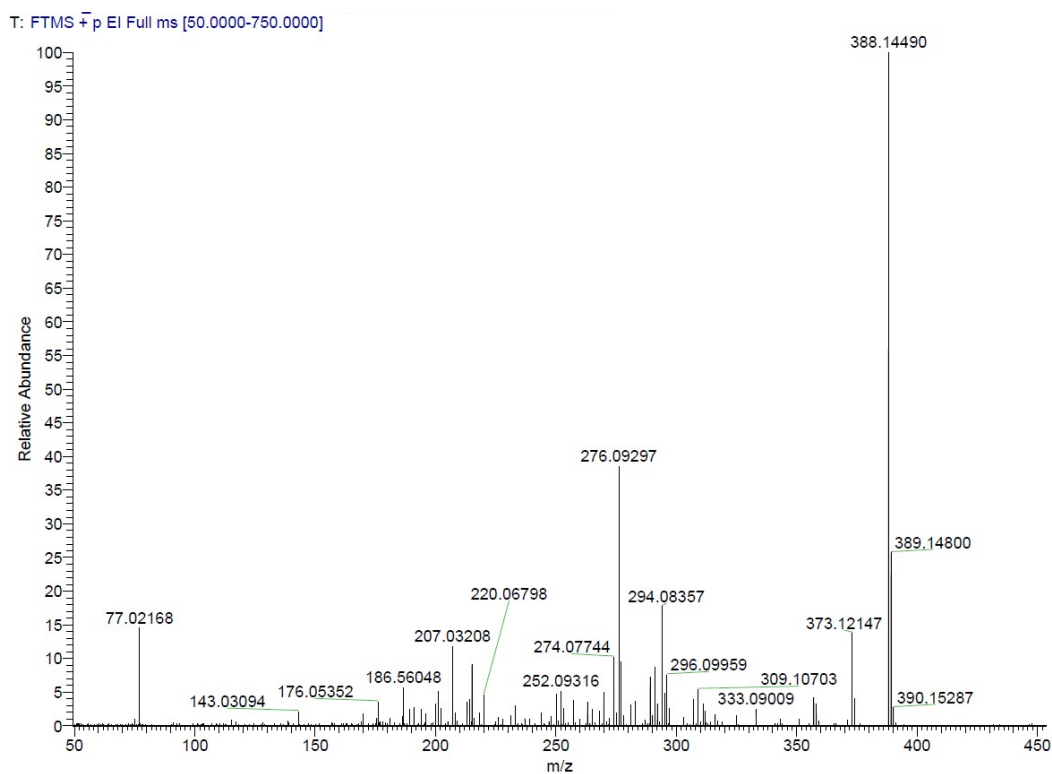

**Figure S18** High resolution EI mass spectrum of compound  $\text{TrPEF}_2\equiv\text{TMS}$ .

## References

- [1] Z. Mao, Z. Yang, C. Xu, Z. Xie, L. Jiang, F. L. Gu, J. Zhao, Y. Zhang, M. P. Aldred, Z. Chi, Two-photon-excited ultralong organic room temperature phosphorescence by dual-channel triplet harvesting. *Chem. Sci.* **2019**, 10 (31), 7352-7357.
- [2] Z. Yang, C. Xu, W. Li, Z. Mao, X. Ge, Q. Huang, H. Deng, J. Zhao, F. L. Gu, Y. Zhang, Z. Chi, Boosting the Quantum Efficiency of Ultralong Organic Phosphorescence up to 52 % via Intramolecular Halogen Bonding. *Angew. Chem. Int. Ed.* **2020**, 59 (40), 17451-17455.
- [3] T. Gbittner, F. Hampel, J.-P. Gisselbrecht, A. Hirsch, End-Cap Stabilized Oligoynes: Model Compounds for the Linear sp Carbon Allotrope Carbyne. *Chem. Eur. J.* **2002**, 8, 408.
